# Supplementary material for: qPCR System for Alongshan Virus Detection
Source: Preprints.org preprint supplement (doi:10.20944/preprints202305.0869.v1), 2023-05-11
Supplement: Supplementary file 3 [file supplementary]

Table S1. Oligonucleotides used for internal control Poliovirus RT-qPCR.

| Oligonucleotide | Sequence |
| --- | --- |
| PVR1 | 5’-CGAACGTGATCCTGAGTGTT-3’ |
| PVP1 | (ROX)-TTGATTCATGAATTTCCTTCATTGGCA-(BHQ-2) |
| PVL1 | 5’- GGCAGACGAGAAATACCCAT- 3’ |

Table S2. Amplification cycle for ALSV qPCR.

| **Amplification step** | **Instruction** |
| --- | --- |
| 1 | **Hold**, 95C, 3 min |
| 2 | **Hold**, 95C, 10 seconds |
| 3 | **Hold**, 58C, 30 seconds |
| 4 | **Plate read** |
| 5 | **Goto** 2, 39 times |

Table S3. Amplification cycle for Poliovirus qPCR.

| **Amplification step** | **Instruction** |
| --- | --- |
| 1 | **Hold**, 95C, 5 min |
| 2 | **Hold**, 95C, 15 seconds |
| 3 | **Hold**, 60C, 45 seconds |
| 4 | **Plate read** |
| 5 | **Goto** 2, 42 times |
